# Supplementary material for: Elevated CO2-induced changes in mesophyll conductance and anatomical traits in wild type and carbohydrate-metabolism mutants of Arabidopsis
Source: PubMed Central journal article supplement — J Exp Bot. 2019 May 6;70(18):4807–18. doi: 10.1093/jxb/erz208 (PMC6760322; doi:10.1093/jxb/erz208), 2019-05-06
Supplement: erz208_suppl_supplementary_figures_s1-s6.pdf [file erz208_suppl_supplementary_figures_s1-s6.pdf]

## Supplementary data

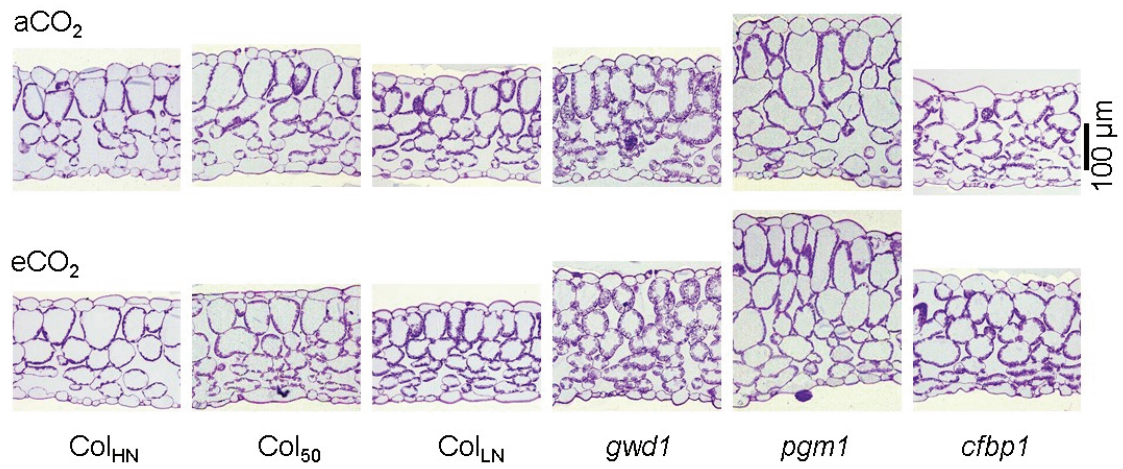

**Figure S1** Cross-sections of the leaves of *Arabidopsis thaliana* Col<sub>HN</sub>, Col<sub>50</sub>, Col<sub>LN</sub>, *gwd1*, *pgm1*, and *cfbp1* grown under ambient CO<sub>2</sub> (aCO<sub>2</sub>, 400 ppm) or elevated CO<sub>2</sub> (eCO<sub>2</sub>, 800 ppm). Scale bar indicates 100 μm.

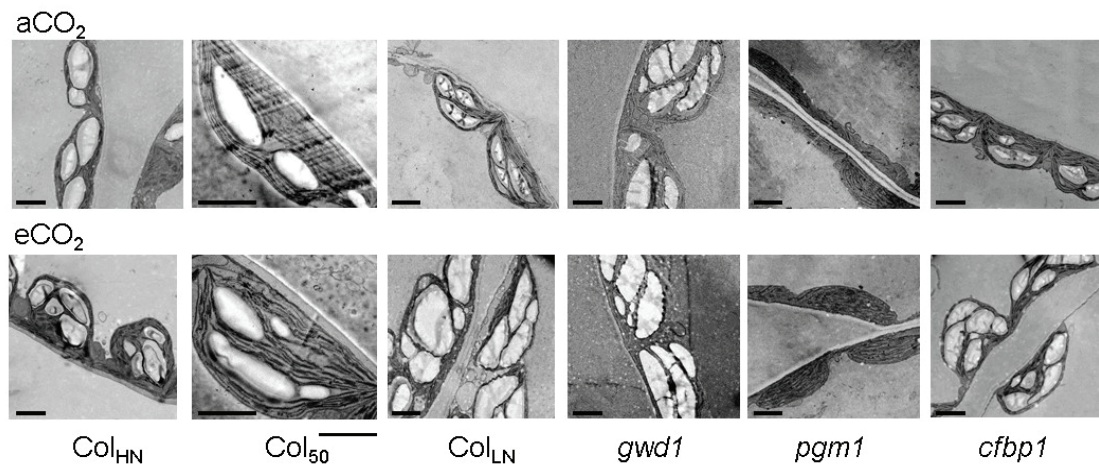

**Figure S2** Electron microscopy of the leaves of *Arabidopsis thaliana* Col<sub>HN</sub>, Col<sub>50</sub>, Col<sub>LN</sub>, *gwd1*, *pgm1*, and *cfbp1* grown under ambient CO<sub>2</sub> (aCO<sub>2</sub>, 400 ppm) or elevated CO<sub>2</sub> (eCO<sub>2</sub>, 800 ppm). Scale bars indicate 2  $\mu$  m.

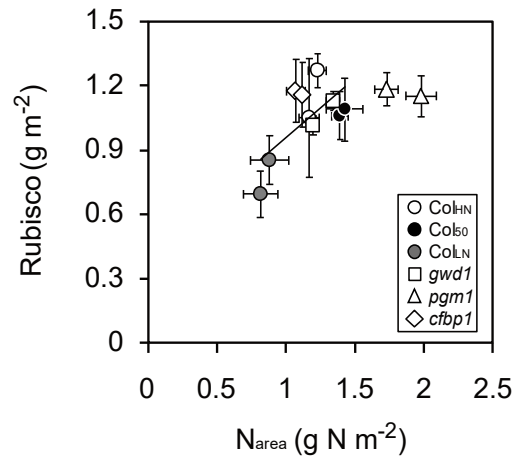

**Fig. S3** Relationship between Rubisco content per area and leaf nitrogen content per area ( $N_{area}$ ) in the leaves of *Arabidopsis thaliana* Col<sub>HN</sub>, Col<sub>50</sub>, Col<sub>LN</sub>, *gwd1*, *pgm1*, and *cfbp1* grown under ambient CO<sub>2</sub> (aCO<sub>2</sub>, 400 ppm) or elevated CO<sub>2</sub> (eCO<sub>2</sub>, 800 ppm). Values are means  $\pm$  SD (n = 4). Solid line is a regression line for Col<sub>HN</sub>, Col<sub>50</sub>, Col<sub>LN</sub>, and *gwd1*, and *cfbp1* ( $R^2 = 0.45$ ).

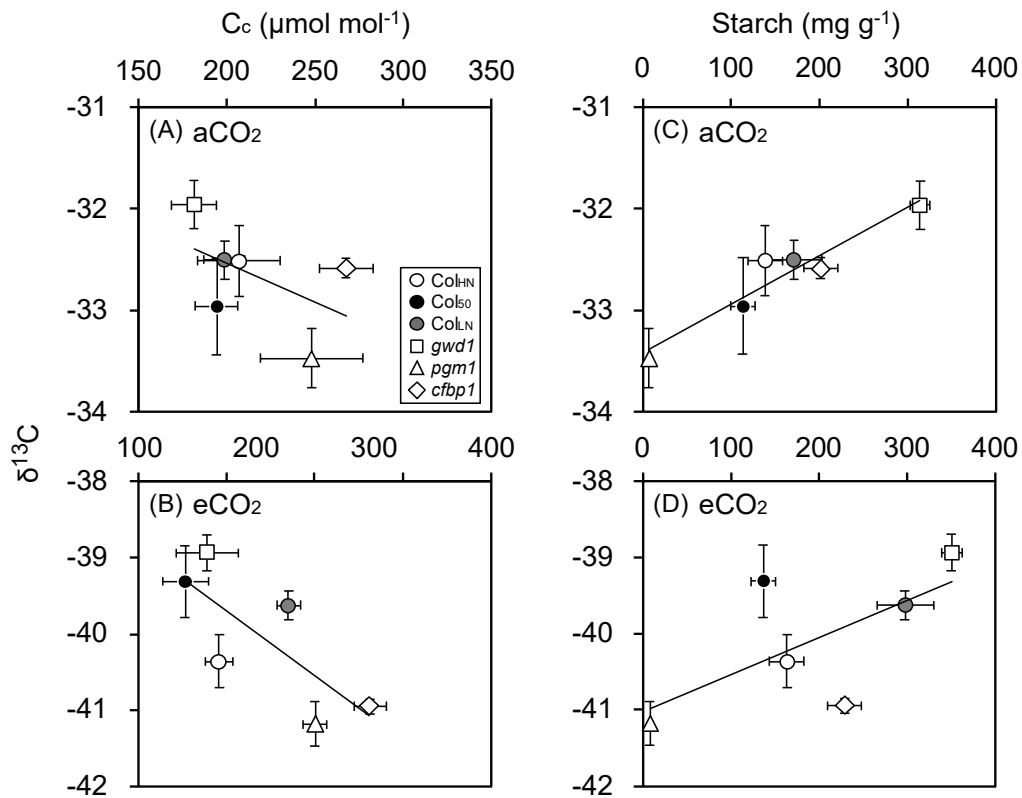

**Figure S4** Relationships between CO<sub>2</sub> concentration at chloroplast ( $C_c$ ) and  $\delta^{13}\text{C}$  at ambient CO<sub>2</sub> (aCO<sub>2</sub>, 400 ppm) (A) and elevated CO<sub>2</sub> (eCO<sub>2</sub>, 800 ppm) (B) and those between starch content and  $\delta^{13}\text{C}$  at aCO<sub>2</sub> (C) and at eCO<sub>2</sub> (D). Open circles, filled circles, grey circles, open triangles, open squares, and open diamonds represent Col<sub>HN</sub>, Col<sub>50</sub>, Col<sub>LN</sub>, *gwd1*, *pgm1*, and *cfbp1* grown under ambient aCO<sub>2</sub> or eCO<sub>2</sub>, respectively. Values are means  $\pm$  SD ( $n = 4$ ). Solid lines are regression lines for all the lines in (A) ( $R^2 = 0.26$ ) and (B) ( $R^2 = 0.58$ ) (C) ( $R^2 = 0.92$ ) and (D) ( $R^2 = 0.43$ ).

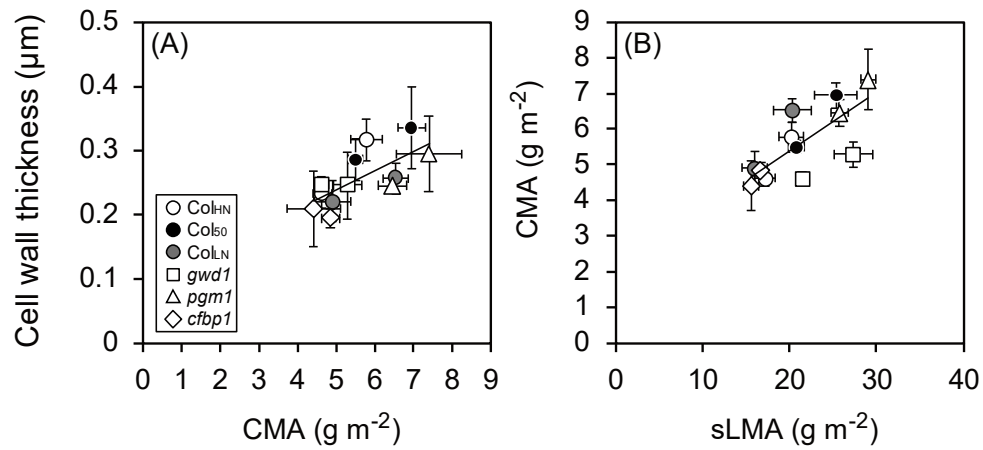

**Fig. S5** Relationship between cell wall thickness and cell wall mass per area (CMA) (A) and that between CMA and structural leaf mass per area (sLMA) (B) in the leaves of *Arabidopsis thaliana* Col<sub>HN</sub>, Col<sub>50</sub>, Col<sub>LN</sub>, *gwd1*, *pgm1*, and *cfbp1* grown under ambient CO<sub>2</sub> (aCO<sub>2</sub>, 400 ppm) or elevated CO<sub>2</sub> (eCO<sub>2</sub>, 800 ppm). Values are means  $\pm$  SD (n = 4). Solid lines are regression lines for all the lines in (A) (R<sup>2</sup> = 0.50) and (B) (R<sup>2</sup> = 0.55).

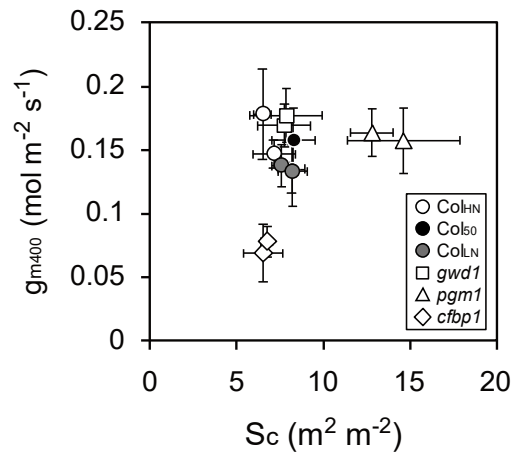

**Fig. S6** Relationship between mesophyll conductance measured at 400 ppm CO<sub>2</sub> ( $g_{m400}$ ) and the chloroplast surface area exposed to intercellular space ( $S_c$ ) for plants grown under ambient CO<sub>2</sub> (aCO<sub>2</sub>, 400 ppm) or elevated CO<sub>2</sub> (eCO<sub>2</sub>, 800 ppm). Open circles, filled circles, grey circles, open triangles, open squares, and open diamonds represent  $Col_{HN}$ ,  $Col_{50}$ ,  $Col_{LN}$ ,  $gwd1$ ,  $pgm1$ , and  $cfbp1$  grown under aCO<sub>2</sub> or eCO<sub>2</sub>, respectively. Values are means  $\pm$  SD (n = 4).
